# Supplementary material
Source: PubMed Central journal article supplement (PMC3042866)
Supplement: supp_dev.056317_DEV056317TableS1.pdf [file supp_dev.056317_DEV056317TableS1.pdf]

**Table S1. Primers used in qRT-PCR**

| Gene       | Primer sequence (5' to 3')                     |
|------------|------------------------------------------------|
| miR-150    | TCTCCAACCCTTGTACCAAGT                          |
| miR-203    | GTGAAATGTTTAGGACCACTAG                         |
| miR-328    | CTGGCCCTCTGCCCCTCCGT                           |
| miR-542-3p | TGTGACAGATTGATAACTGAAA                         |
| miR-542-5p | CTCGGGGATCATCATGTCACGA                         |
| miR-667    | TGACACCTGCCACCCAGCCCAAG                        |
| miR-689    | CGTCCCCGCTCGGCGGGGTCC                          |
| miR-710    | CCAAGTCTTGGGGAGAGTTGAG                         |
| miR-744    | TGCGGGGCTAGGGCTAACAGCA                         |
| miR-763    | CCAGCTGGGAAGAACCAGTGCC                         |
| miR-764-3p | AGGAGGCCATAGTGGCAACTGT                         |
| miR-764-5p | GGTGCTCACATGTCCTCCT                            |
| miR-770-3p | CGTGGGCCTGACGTGGAGCTGG                         |
| miR-7a     | TGGAAGACTAGTGATTTTGTGT                         |
| miR-99b-1  | CAAGCTCGTGTCTGTGGGTCCG                         |
| miR-135a-1 | TATAGGGATTGGAGCCGTGGCG                         |
| miR-293    | AGTGCCGCAGAGTTTGTAGTGT                         |
| miR-330    | TCTCTGGGCCTGTGTCTTAGGC                         |
| miR-615-5p | GGGGGTCCCCGGTGCTCGGATC                         |
| T adapter  | GCGAGCACAGAATTAATACGACTCACTATAGGTTTTTTTTTTTTVN |
| Adapter rv | GCGAGCACAGAATTAATACGAC                         |
| U6F        | CGCTTCGGCAGCACATATAC                           |
| U6R        | TTCACGAATTTGCGTGTCAT                           |
